# Supplementary material for: The effect of architecture/composition on the pH sensitive micelle properties and in vivo study of curcuminin-loaded micelles containing sulfobetaines
Source: Royal Society of Chemistry journal article supplement (doi:10.1039/c5ra20847e), 2015-01-01
Supplement: c5ra20847e1.pdf [file c5ra20847e1.pdf]

## Supplementary

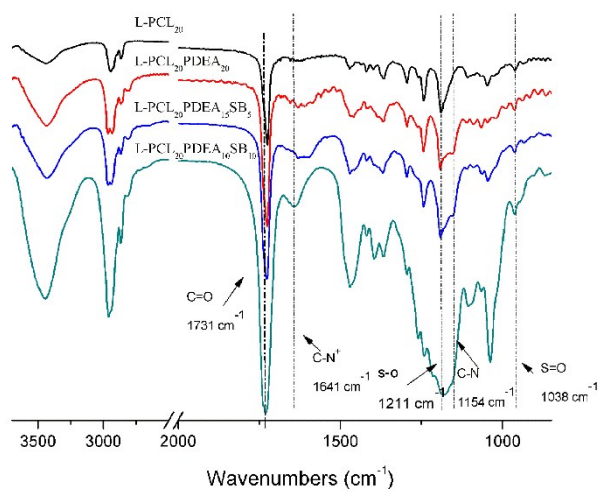

**Figure S1.** FT-IR spectra for PCL, PCL-PDEA and PCL-PDEASB.

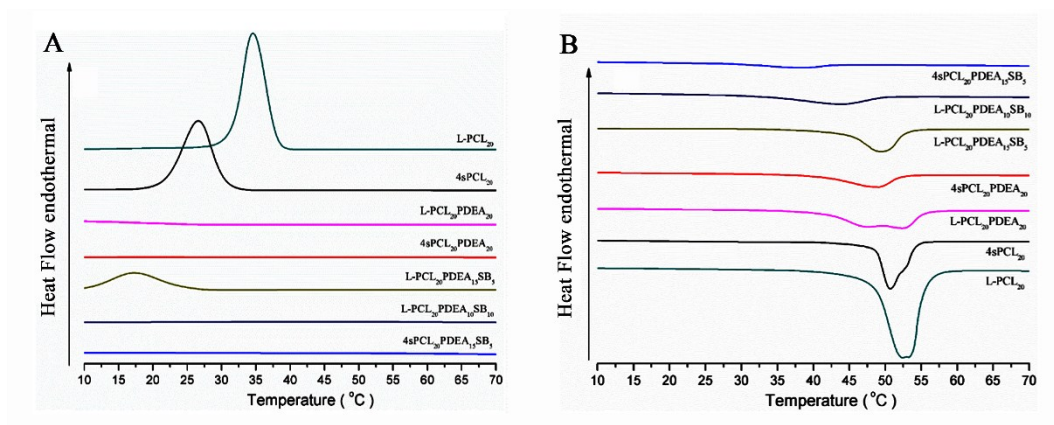

**Figure S2.** The DSC curves of PCL, PCL-PDEA and PCL-PDEASB.
